# Supplementary material for: Trophic position and dietary breadth of bats revealed by nitrogen isotopic composition of amino acids
Source: PubMed Central journal article supplement (PMC5698291; doi:10.1038/s41598-017-15440-3), 2017-11-21
Supplement: 41598_2017_15440_MOESM1_ESM.pdf [file 41598_2017_15440_MOESM1_ESM.pdf]

**Trophic position and dietary breadth of bats revealed by nitrogen isotopic composition of amino acids**

Caitlin J. Campbell <sup>\*</sup>, David M. Nelson, Nanako O. Ogawa, Yoshito Chikaraishi, and Naohiko Ohkouchi

**Supplemental Information 1**

**Supplementary Figure 1**

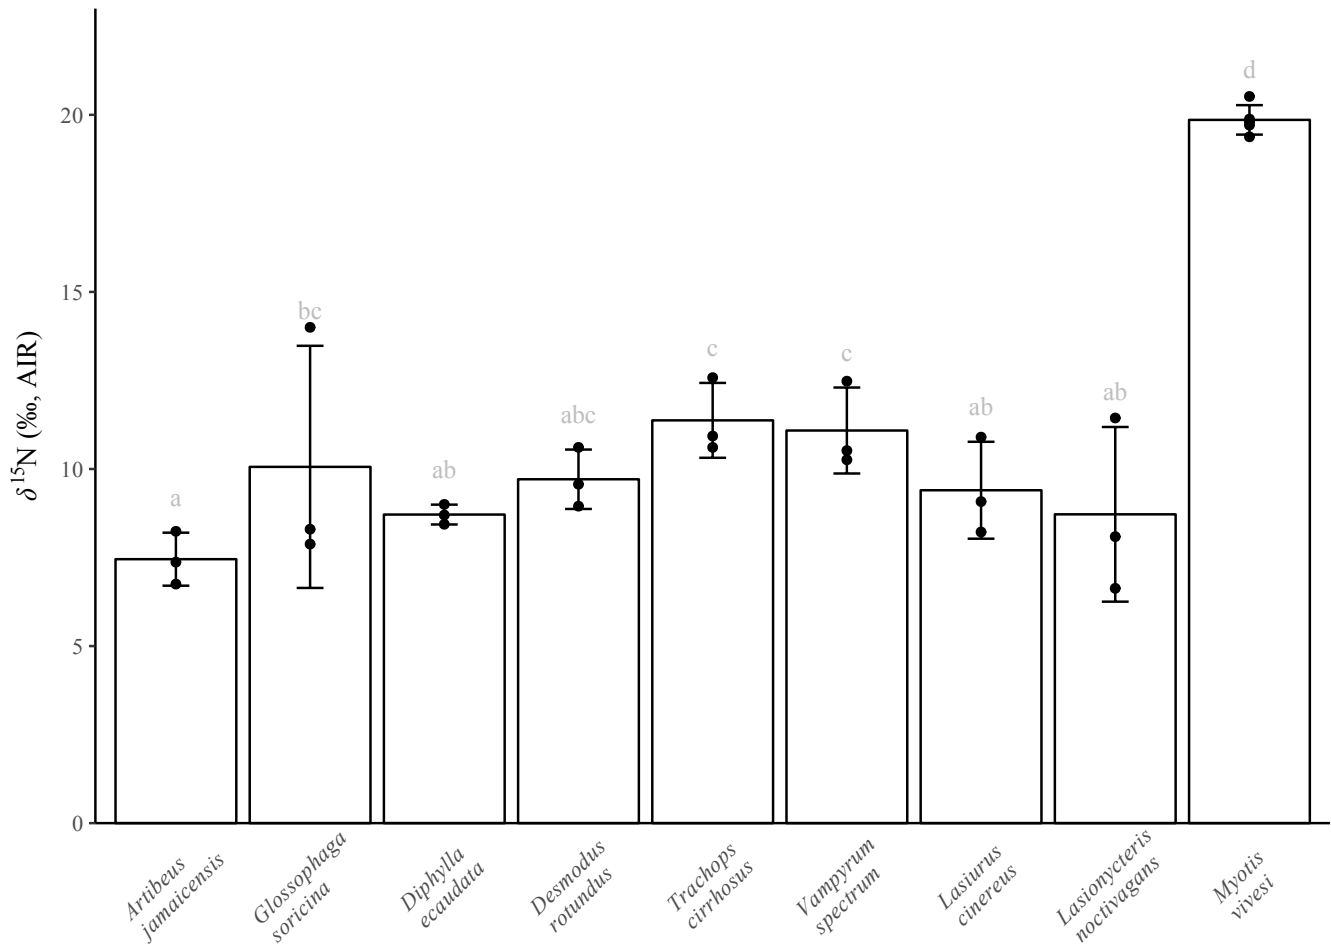

**Sup. Fig. 1**  $\delta^{15}\text{N}$  values of bulk hair samples. Letters indicate species-level differences in  $\delta^{15}\text{N}$  values determined by Tukey's test of mean comparison.
